# Supplementary material for: N-Doped carbon coated bismuth nanorods with a hollow structure as an anode for superior-performance potassium-ion batteries
Source: Royal Society of Chemistry journal article supplement (doi:10.1039/c9nr09867d), 2020-01-01
Supplement: c9nr09867d1.pdf [file c9nr09867d1.pdf]

## **Electronic Supplementary Information:**

### **N-doped Carbon Coated Bismuth Nanorod with Hollow Structure as Anode for Superior-Performance Potassium-Ion Batteries**

Hang Li <sup>a</sup>, Chunxia Zhao <sup>a</sup>, Yameng Yin <sup>a</sup>, Yujie Zou <sup>a</sup>, Yang Xia <sup>a</sup>, Qinyou An <sup>a</sup>,  
Zelang Jian <sup>a, \*</sup>, Wen Chen <sup>a</sup>

<sup>a</sup> State Key Laboratory of Advanced Technology for Materials Synthesis and  
Processing, School of Materials Science and Engineering, Wuhan University of  
Technology, 430070, Wuhan, P. R. China.

\* E-mail address: zelangjian@whut.edu.cn

## Experimental Section:

**Materials Synthesis:** A simple hydrothermal method was used to prepare the  $\text{Bi}_2\text{S}_3$  nanorods.  $\text{Na}_2\text{S}\cdot 9\text{H}_2\text{O}$ ,  $\text{Bi}(\text{NO}_3)_3\cdot 5\text{H}_2\text{O}$ , and urea were dissolved in deionized water, glycol, and deionized water, respectively. Subsequently, the solution was mixed and transferred to stainless steel autoclave with Teflon-liner at  $120\text{ }^\circ\text{C}$  for 24 h. The product was washed with deionized water and alcohol. For carbon coating, as-prepared  $\text{Bi}_2\text{S}_3$  nanorods, sodium dodecyl sulfate and pyrrole were added into deionized water with stirring and ultrasound. Then,  $(\text{NH}_4)_2\text{S}_2\text{O}_8$  solution was added into the mixture and complete reacted. After that, the product was washed by water and dried overnight. Finally,  $\text{Bi@N-CT}$  was prepared by annealing under  $\text{N}_2$  atmosphere at  $650\text{ }^\circ\text{C}$  for 2 hours. Nickel-based Prussian White ( $\text{K}_{1.74}\text{Ni}[\text{Fe}(\text{CN})_6]_{0.95}\square_{0.05}\cdot 1.45\text{H}_2\text{O}$  (note as KNF) was synthesized via a co-precipitation of potassium ferrocyanide and nickel salt.

**Materials characterization:** XRD patterns of the samples were characterized by the X-ray diffractometer (Empyrean, PANalytical) with  $\text{Cu K}\alpha$  radiation (0.154 nm). TGA data were measured using a thermal analyzer (STA409PC, NETZSCH) from  $50\text{ }^\circ\text{C}$  to  $800\text{ }^\circ\text{C}$  at a heating rate of  $5\text{ }^\circ\text{C}\cdot\text{min}^{-1}$  under an oxygen atmosphere. The morphologies of the samples were observed using FESEM (Zeiss Ultra Plus). The internal structure of sample was analyzed by TEM (Talos F200S, FEI). For *in-situ* XRD analysis (D8 Advance, Bruker), the electrode was placed on an iron net near a beryllium window. The XRD signals were collected by the planar detector in a still mode.

**Electrochemical measurements:** To test the electrochemical performance, a slurry was prepared by mixing Bi@N-CT, super-p, and a binder sodium polyacrylate with a weight ratio of 70: 20: 10 in deionized water. The slurry was spread onto the aluminum foil and dried in a vacuum oven at 60 °C. The electrodes were assembled into CR2032 coin cells with the potassium metal as the counter electrode in an argon-filled glove-box. The electrolyte solution was 1 M KPF<sub>6</sub> in 1, 2-dimethoxyethane (DME). Cells were tested on a Land Battery Testing System and Neware Testing System with galvanostatic charge and discharge in the voltage range of 0.01~1.5 V. Cyclic voltammogram (CV) tests were performed with an Autolab PGSTAT30 electrochemical workstation (Metrohm).

**DFT calculations of K<sub>3</sub>Bi<sub>2</sub> parameters:** The structure of K<sub>3</sub>Bi<sub>2</sub> is based on the Cs<sub>3</sub>Bi<sub>2</sub> (COD: 4116198) with the element replacement from Cs to K. The general gradient approximation was employed in the form of a Perdew-Burke-Ernzerhof solid (PBEsol) exchange-correlation functional using CASTEP program. The plane wave cutoff was set to 600 eV. Self-consistency tolerance is set as  $1.0 \times 10^{-8}$  eV. The force convergence criterion on the atoms is 0.02 eV Å<sup>-1</sup>.

Supporting Figures:

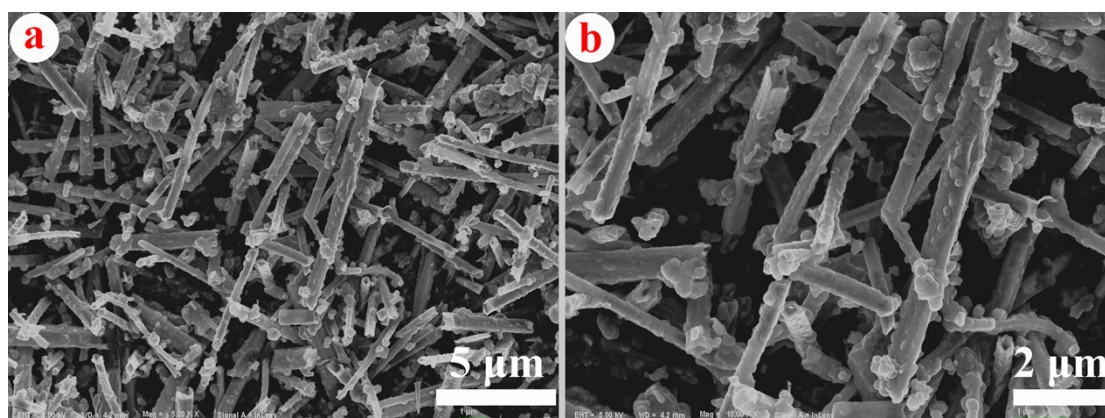

Fig. S1. FESEM images of  $\text{Bi}_2\text{S}_3@\text{PPy}$ .

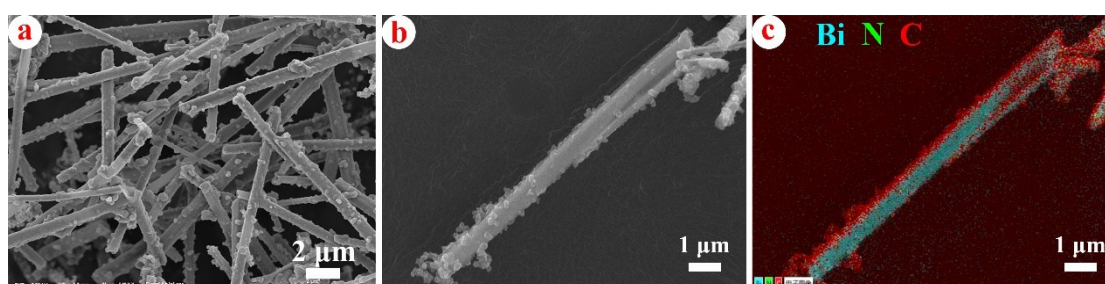

Fig. S2. FESEM image of  $\text{Bi}@\text{N-CT}$ .

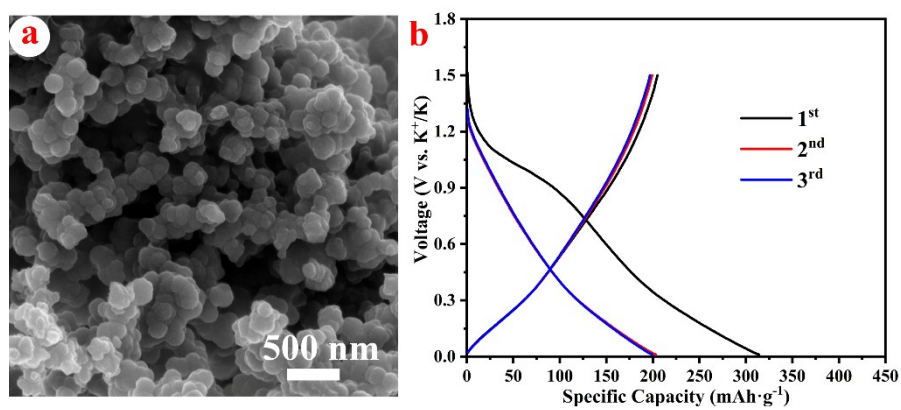

Fig. S3. a) FESEM image of N-C. b) Discharge/charge curves of N-C.

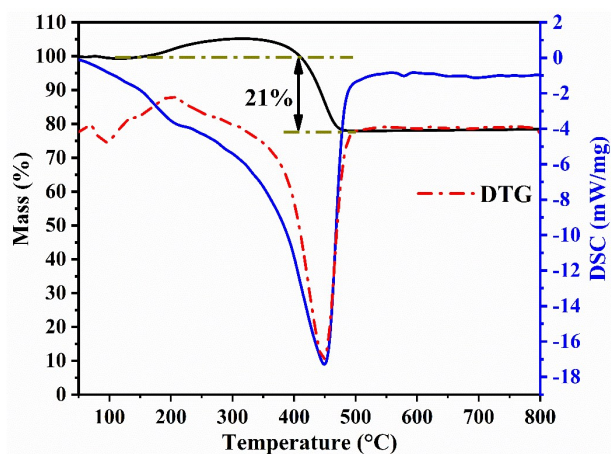

**Fig. S4.** TGA curves of Bi@N-CT under oxygen atmosphere.

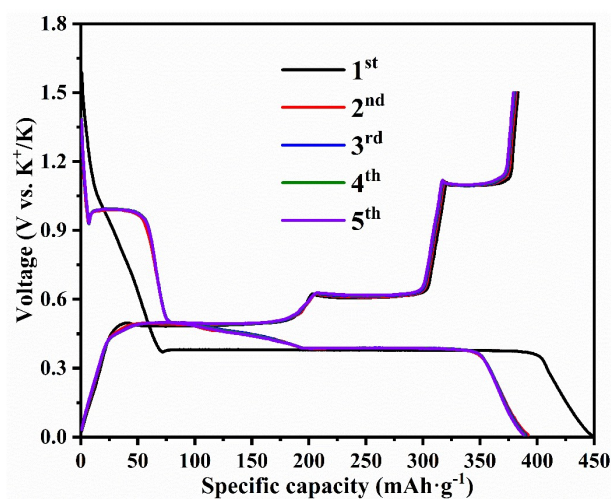

**Fig. S5.** First five discharge/charge curves of Bulk Bi for PIBs.

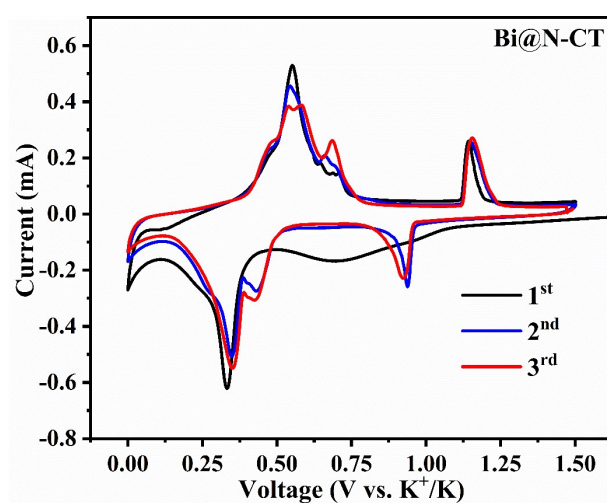

**Fig. S6.** CV curves of Bi@N-CT for PIBs.

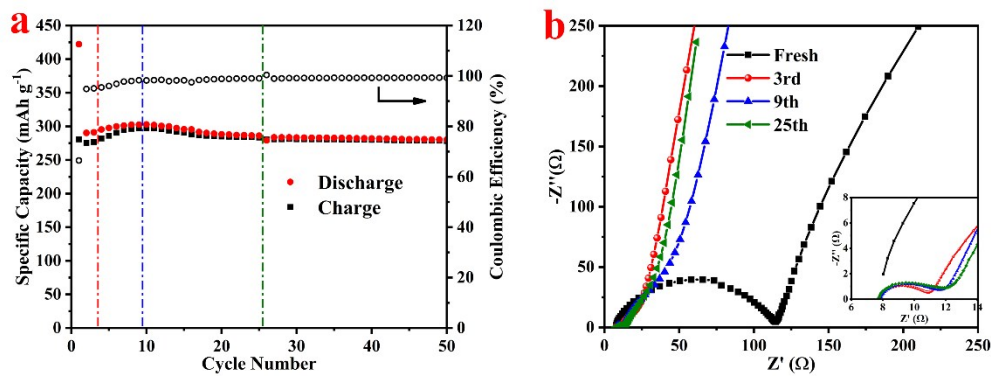

**Fig. S7.** a) Cycling performance of Bi@N-CT as anode for PIBs at 1C. b) The corresponding EIS spectra over different cycles.

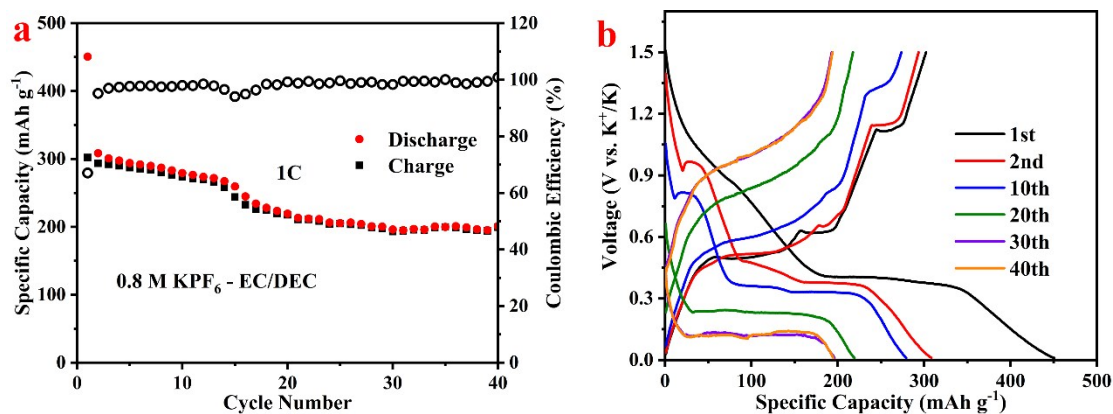

**Fig. S8.** The cycling performance of Bi@N-CT for PIBs with a KPF<sub>6</sub>-EC/DEC electrolyte.

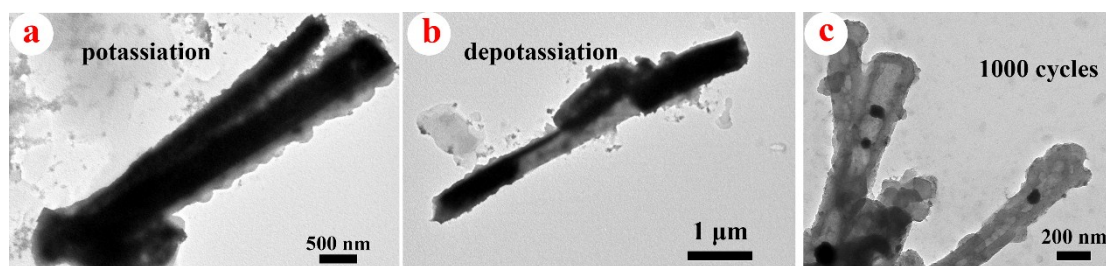

**Fig. S9.** TEM images of the Bi@N-CT at a) first fully discharged state and b) first charged state at 1C; c) cycled over 1000 cycles.



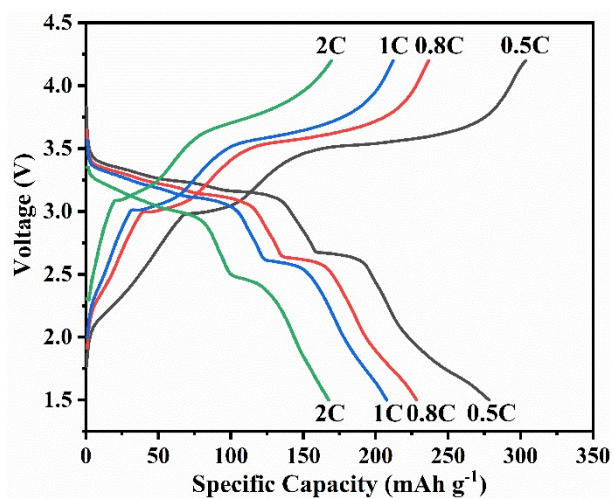

**Fig. S10.** Potassium storage performance of the  $\text{K}_{1.74}\text{Ni}[\text{Fe}(\text{CN})_6]_{0.95}\square_{0.05}\cdot 1.45\text{H}_2\text{O}$

//Bi@N-CT coin type full cells. a) Cycling performance. b) Rate capability.

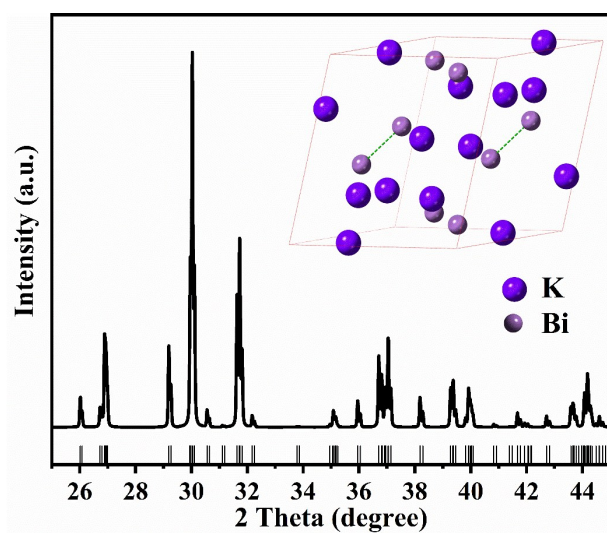

**Fig. S11.** Crystal structure and XRD pattern of  $\text{K}_3\text{Bi}_2$  simulated by DFT calculation.

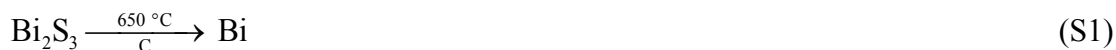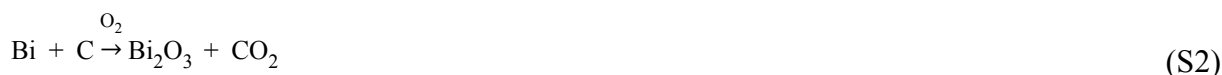

**Table S1.** Capacity retentions of previous bismuth-based materials for PIBs.

| Sample          | Current Density<br>(A g <sup>-1</sup> ) | Cycle<br>Number | Capacity<br>Retention (%) | Reference |
|-----------------|-----------------------------------------|-----------------|---------------------------|-----------|
| This Work       | 3.8                                     | 1000            | 88                        |           |
| Bi/rGO          | 0.05                                    | 50              | 66                        | Ref. 1    |
| Bi@3DGF         | 1                                       | 400             | 71                        | Ref. 2    |
| UCF@<br>CNs@BiN | 0.1                                     | 600             | 76                        | Ref. 3    |
| Bi@N-C          | 10                                      | 1000            | 76                        | Ref. 4    |
| Bi@C            | 0.2                                     | 600             | 85                        | Ref. 5    |

**Reference:**

- [1] Q. Zhang, J. Mao, W. K. Pang, T. Zheng, V. Sencadas, Y. Chen, Y. Liu and Z. Guo, *Adv. Energy Mater.*, 2018, **8**, 1703288.
- [2] X. Cheng, D. Li, Y. Wu, R. Xu and Y. Yu, *J. Mater. Chem. A*, 2019, **7**, 4913.
- [3] S. Su, Q. Liu, J. Wang, L. Fan, R. Ma, S. Chen, X. Han and B. Lu, *ACS Appl. Mater. Interfaces*, 2019, **11**, 22474.
- [4] H. Yang, R. Xu, Y. Yao, S. Ye, X. Zhou and Y. Yu, *Adv. Funct. Mater.*, 2019, **29**, 1809195.
- [5] R. Zhang, J. Bao, Y. Wang, C and F. Sun, *Chem. Sci. Chem. Sci.*, 2018, **9**, 6193.
